# Supplementary material
Source: publisher site journal article supplement (https://www.dovepress.com/article/437860)
Supplement: Supplementary file 1 [file get_supplementary_file.php]

**Table S1.** Drug release kinetics of E/AC-Au/MTX

| <b>Formulation</b> | <b>Zero order</b> |       | <b>First order</b> |       | <b>Higuchi</b> |       | <b>Korsmeyer-Peppas</b> |       |          |
|--------------------|-------------------|-------|--------------------|-------|----------------|-------|-------------------------|-------|----------|
|                    | $r^2$             | $k_0$ | $r^2$              | $k_1$ | $r^2$          | $k_2$ | $r^2$                   | $k_3$ | <b>n</b> |
| E/AC-Au/MTX        | 0.6120            | 2.56  | 0.7276             | 0.02  | 0.8196         | 16.29 | 0.9787                  | 78.02 | 0.3571   |

$r^2$ : correlation coefficient,  $k_0 - k_3$ : rate constants, n: diffusional exponent.

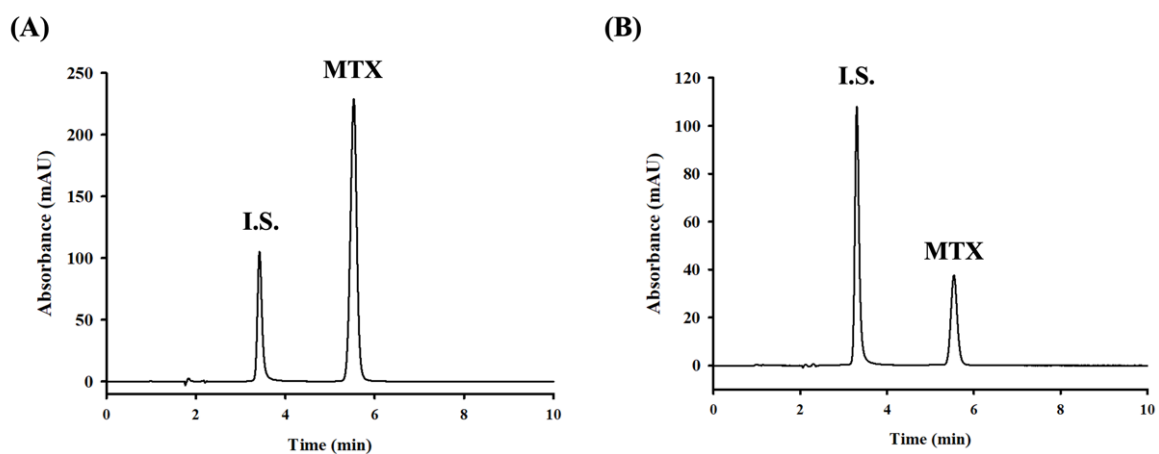

**Figure S1.** HPLC chromatograms of (A) MTX solution (40  $\mu\text{g/mL}$ ) and (B) the supernatant to determine the entrapment efficiency of MTX-loaded nanoparticles.

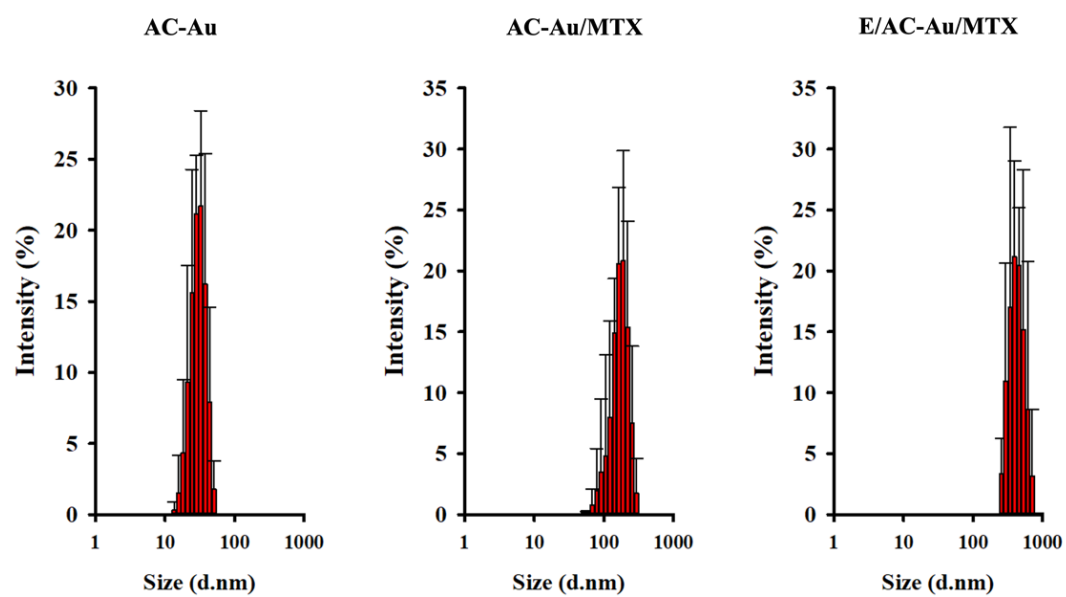

**Figure S2.** Particle size distribution of AC-Au-based nanoparticles determined by DLS.

(A) CCD-18Co

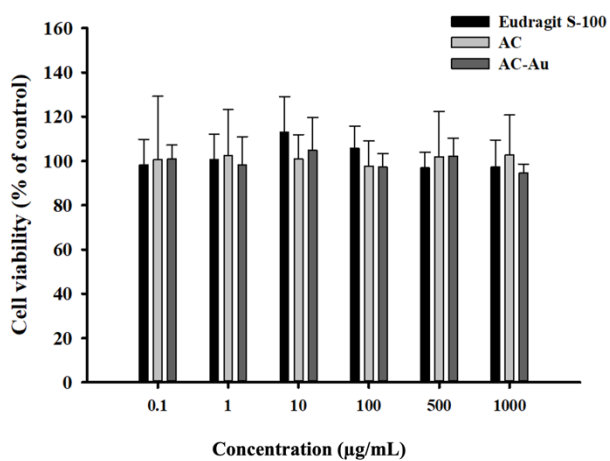

(B) HEK-293

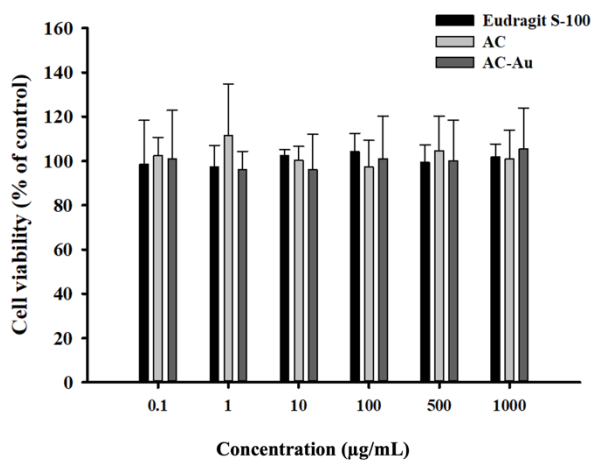

**Figure S3.** Cytotoxic effect of vehicle components in (A) CCD-18Co cells and (B) HEK-293 cells (mean  $\pm$  SD, n = 6). Eudragit®-S 100 (methacrylic acid-methyl methacrylate copolymer (1:2)): a surface coating polymer, AC: aminoclay, and AC-Au: aminoclay-gold nanoparticles.
